# Supplementary material for: Critical Role of Transcription Factor PU.1 in the Function of the OX40L/TNFSF4 Promoter in Dendritic Cells
Source: PubMed Central journal article supplement (PMC5052589; doi:10.1038/srep34825), 2016-10-06
Supplement: srep34825-s1.pdf [file srep34825-s1.pdf]

**Critical Role of Transcription Factor PU.1 in the Function  
of the OX40L/TNFSF4 Promoter in Dendritic Cells**

**Takuya Yashiro, Mutsuko Hara, Hideoki Ogawa, Ko Okumura,  
and Chiharu Nishiyama**

Department of Biological Science and Technology,

Faculty of Industrial Science and Technology, Tokyo University of Science,

6-3-1 Nijjuku, Katsushika-ku, Tokyo, 125-8585, Japan

Atopy Research Center, Juntendo University School of Medicine,

2-1-1 Hongo, Bunkyo-ku, Tokyo, 113-8421, Japan

Supplementary Table 1. Sequence of primers used in construction of reporter vectors.

| 5' position | Direction | Sequence                        |
|-------------|-----------|---------------------------------|
| -657        | Forward   | ACACggtaccGGGTGGGGAATGACAGAATT  |
| -476        | Forward   | TGATggtaccTGTA ACTATAAGACCCCTTC |
| -291        | Forward   | ACACggtaccGGTTAAGACATCTTGAGGG   |
| -136        | Forward   | ACACggtaccAAACA ACTCCCTGTTAGCCC |
| +71         | Reverse   | CACCagatctGAGCCAATAAGGGCAAAGTC  |

| Mutation site | Direction | Sequence                          |
|---------------|-----------|-----------------------------------|
| Ets5          | Forward   | GTCACTCTAGAGTTCCCCGCCTGCAAA       |
|               | Reverse   | GAACTCTAGAGTGACTAATCTGAATTTC      |
| Ets6          | Forward   | AGAAGTCGACCCGCCTGCAAAACCTGC       |
|               | Reverse   | GGCGGGTCGACTTCTATGTGACTAATCTGAATT |

Supplementary Table 2. Sequence of primers used in ChIP assay.

| Species   | Amplified region | Direction   | Sequence                             |                                  |
|-----------|------------------|-------------|--------------------------------------|----------------------------------|
| Mouse     | -4992/-4889      | Forward     | TGGTGGGAAGAGATGAAAGACA               |                                  |
|           |                  | Reverse     | CTTACCTCCTTCTTTTTCTATTTCTGATA<br>ATC |                                  |
|           | -4525/-4451      | Forward     | AACCCAGGAGCCACACCTT                  |                                  |
|           |                  | Reverse     | AGTACTGGCTTTTCTTTAGCCTTG             |                                  |
|           | -1524/-1434      | Forward     | GCTGCAGAGTAGCCTATGTG                 |                                  |
|           |                  | Reverse     | GAGGCGTTGCATTTGGAGAC                 |                                  |
|           | -744/-637        | Forward     | AGAGCAACAAGCCTCAAATG                 |                                  |
|           |                  | Reverse     | AATTCTGTCATTCCCCACCC                 |                                  |
|           | -57/+3           | Forward     | TCCCCGCCTGCAAA                       |                                  |
|           |                  | Reverse     | AATTGAAGGAGCAGAGCAGAGTCT             |                                  |
|           | +3627/+3704      | Forward     | ACTTCTTGTCTCTTGTCTTCTGTTAGGAA        |                                  |
|           |                  | Reverse     | ACATCACCAAGAGACTGAATTCTAACTC         |                                  |
|           | Human            | -1322/-1249 | Forward                              | TTTTGGCTTGGAGTCTATGATATTGT       |
|           |                  |             | Reverse                              | GAGAACATACTGGTGTGAGAAATTTA<br>AG |
| -521/-455 |                  | Forward     | TGCAATAGACTACAACCAAGGATCTC           |                                  |
|           |                  | Reverse     | GAAAAAGACAAAACAAGAAAATAGGA<br>CACT   |                                  |
| -73/-18   |                  | Forward     | CCGCCTGCCTGCAAAA                     |                                  |
|           |                  | Reverse     | GAAAGAGCAAAGCGGACTCTCT               |                                  |

\*+1; Transcription start site

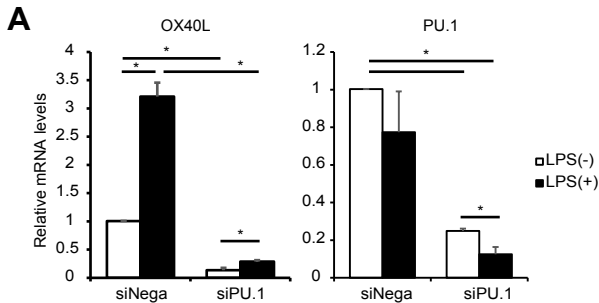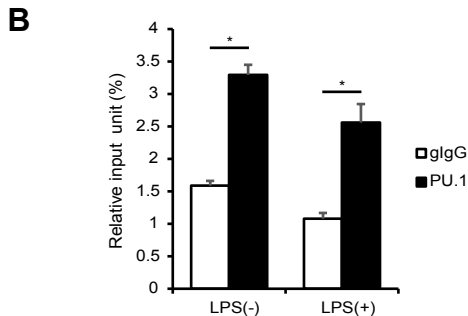

**Supplemental Figure 1.** Expression of OX40L in PU.1 siRNA-transfected JAWSII cells and specific binding of PU.1 to the OX40L promoter in JAWSII cells.

(A) JAWSII cells were transfected with either negative control siRNA (siNeg) or PU.1 siRNA (siPU.1). At 32 h after transfection, the cells were left untreated (open bars) or stimulated (closed bars) with 1  $\mu$ g/ml LPS for 16 h. Relative mRNA levels were determined by quantitative RT-PCR after normalizing to mouse GAPDH mRNA levels. Data are expressed as the ratio of the expression level of the respective control siRNA-transfected cells without stimulation. Results are shown as means  $\pm$  S.D.s ( $n=3$ ).

(B) ChIP assay was performed by using either goat IgG (gIgG) or anti-PU.1 Ab (PU.1). The amounts of immunoprecipitated chromatin were determined by quantitative PCR amplifying the indicated region of the OX40L promoter. Data are expressed as percentage of the input for each ChIP assay. Results are means  $\pm$  S.D.s ( $n=3$ ). Similar results were obtained in three independent experiments.
